# Supplementary material for: Convergent Estimates of Biomass Burning-Derived Atmospheric Ammonia in Peninsular Southeast Asia
Source: Copernicus journal article supplement (doi:10.5194/acp-2020-1061), 2021-01-11
Supplement: Supplementary file 1 [file acp-2020-1061-supplement.pdf]

Supporting Information for

**Convergent estimates of biomass burning-derived atmospheric ammonia in  
Peninsular Southeast Asia**

Yunhua Chang<sup>1</sup>, Yan-Lin Zhang<sup>1</sup>, Sawaeng Kawichai<sup>2</sup>, Qian Wang<sup>1</sup>, Martin Van Damme<sup>3</sup>,  
Lieven Clarisse<sup>3</sup>, Tippawan Prapamontol<sup>2</sup>, and Moritz F. Lehmann<sup>4</sup>.

<sup>1</sup>Yale-NUIST Center on Atmospheric Environment, Nanjing University of Information Science & Technology,  
Nanjing 210044, China

<sup>2</sup>Research Institute for Health Sciences (RIHES), Chiang Mai University, Chiang Mai 50200, Thailand

<sup>3</sup>Université libre de Bruxelles (ULB), Spectroscopy, Quantum Chemistry and Atmospheric Remote Sensing  
(SQUARES), Brussels B-1050, Belgium

<sup>4</sup>Department of Environmental Sciences, University of Basel, Basel 4056, Switzerland

Corresponding author: Yan-Lin Zhang (dryanlinzhang@outlook.com).

**Contents of this file**

Text S1  
Figures S1 to S2  
Table S1

### **Text S1. Bayesian isotopic mixing modeling**

The Bayesian mixing model makes use of stable isotope data to determine the probability distribution of source contributions to a mixture, explicitly accounting for uncertainties associated with multiple sources, their isotopic signatures, and isotope fractionation during transformations. The model has been widely used in ecological studies, such as food-web analyses. In Bayesian theorem, the contribution of each source is calculated based on mixed data and prior information, such that:

$$P(f_q | \text{data}) = \theta(\text{data} | f_q) \times p(f_q) / \sum \theta(\text{data} | f_q) \times p(f_q)$$

where  $\theta(\text{data}|f_q)$  and  $p(f_q)$  refer to the likelihood of the given mixed isotope signature, and the pre-determined probability of the given state of nature, based on prior information, respectively. The denominator represents the numerical approximation of the marginal probability of the data. In a Bayesian model (stable isotope in R; SIAR), isotope signatures from the mixed data pool are assumed to be normally distributed. Uncertainty in the distribution of isotope sources and associated isotope fractionation during transformations are factored into the model by defining respective mean ( $\mu$ ) and standard deviation ( $\sigma$ ) parameters. Prior knowledge about proportional source contributions ( $f_q$ ) is parametrized using the Dirichlet distribution, with an interval of [0, 1]. To assess the likelihood of the given  $f_q$ , the proposed proportional contribution is combined with a user-specified isotope distribution of sources and their associated isotope effects to develop a proposed isotope distribution for the mixture. The probability of fractional source contributions ( $f_q$ ) is calculated by the Hilborn sampling-importance-resampling method.

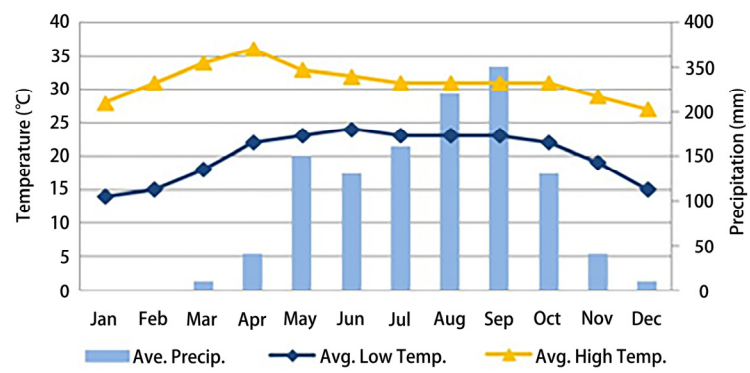

**Figure S1.** Monthly average temperatures and rainfall in Chiang Mai.

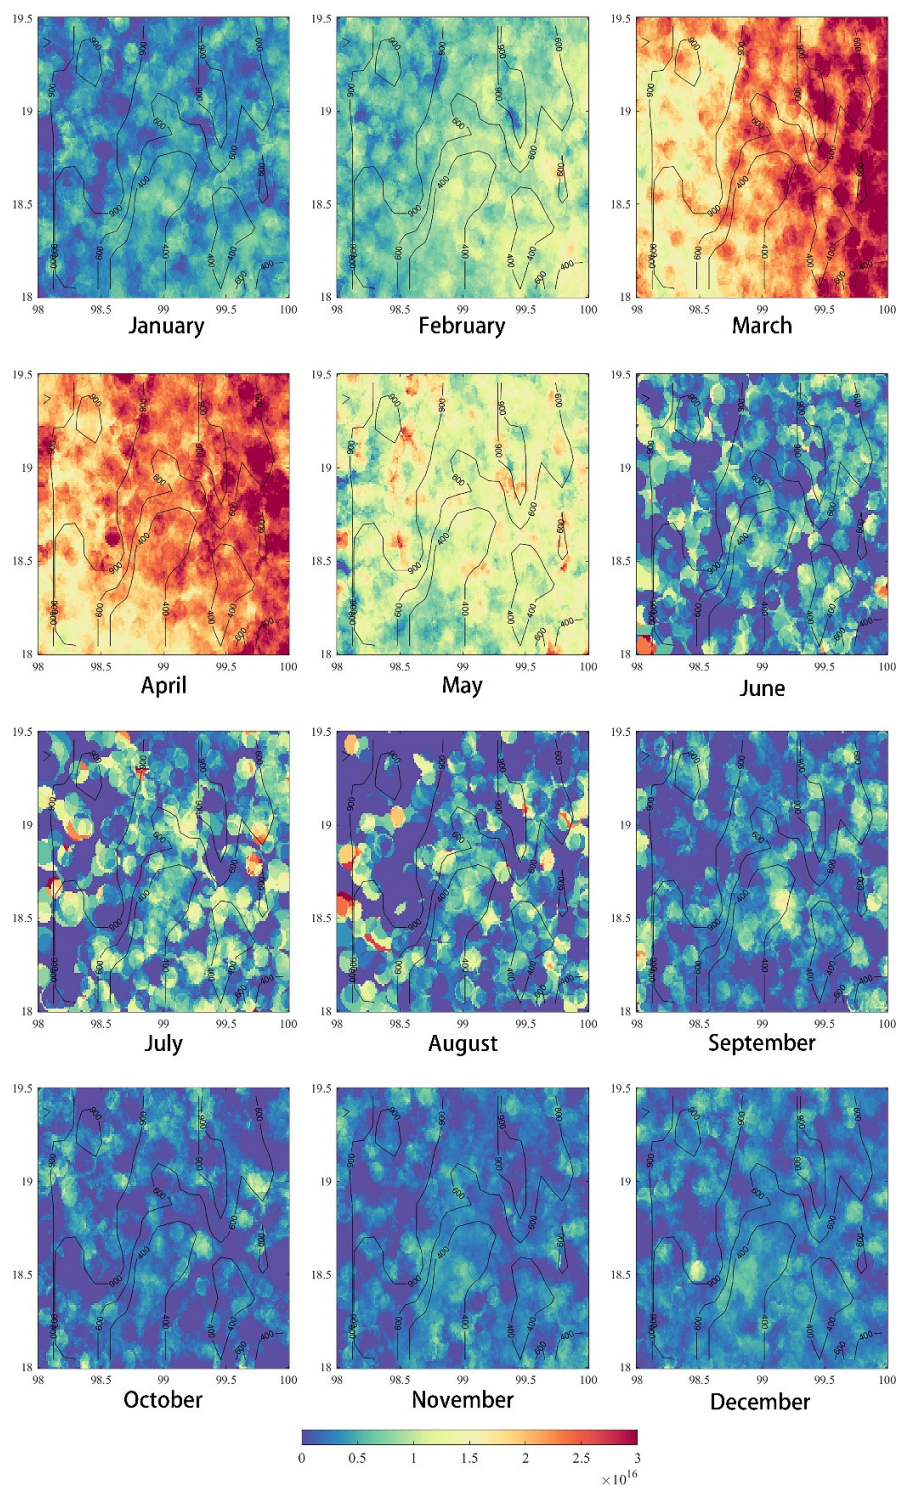

**Figure S2.** The IASI Metop-A and Metop-B monthly averaged  $\text{NH}_3$  distribution (molec  $\text{cm}^{-2}$ ) for 11 years (2008-2018).

**Table S1.** The description of each site used in this study.

| Site | Description                                                      | Abbreviate | Latitude      | Longitude     | Attitude (m) | Remark                      |
|------|------------------------------------------------------------------|------------|---------------|---------------|--------------|-----------------------------|
| S1   | Chiang Mai University (Suburban)                                 | CMU        | 18°47'42.65"N | 98°57'28.36"E | 345          | Passive samples and Medium  |
| S2   | Tad Chompoo reservoir at Chiang Mai University ( Suburban)       | TCR        | 18°48'12.58"N | 98°56'49.54"E | 366          | Passive samples             |
| S3   | Sangwanwittaya school, Chiang Mai Province (Rural)               | SW         | 18°48'32.02"N | 98°54'48.00"E | 1,116        | Passive samples and Medium  |
| S4   | Nong Tao health center, Mae Wang District, Chiang Mai (Rural)    | NT         | 18°40'51.17"N | 98°33'06.06"E | 1,016        | Passive samples and Medium  |
| S5   | Khun Klang health center, Chom Tong District, Chiang Mai (Rural) | KK         | 18°32'18.60"N | 98°31'29.02"E | 1,269        | Passive samples and Medium  |
| S6   | Northern region school for the blind (Urban-Traffic)             | NRS        | 18°47'15.02"N | 98°58'41.37"E | 316          | Passive samples             |
| S7   | Chaeng Kha Thump (Urban-Traffic)                                 | CKT        | 18°46'53.88"N | 98°59'33.68"E | 309          | Passive samples             |
| S8   | Municipal Nong Phueng, Sarapee, Chiang Mai (Urban)               | MNP        | 18°44'37.08"N | 99°00'48.78"E | 307          | Passive samples             |
| S9   | Sarapee hospital, Saraphi district, Chiang Mai (Urban)           | SP         | 18°40'53.41"N | 99°02'35.63"E | 298          | Passive samples and MiniVol |
